# Supplementary material
Source: publisher figshare collection journal article supplement (https://acs.figshare.com/ndownloader/files/4366096)
Supplement: Supplementary file 1 [file 4366096]

## Supporting Information

### Interaction of Mesoporous Silica Nanoparticles with Human Red Blood

#### Cell Membranes: Size and Surface Effects

Yannan Zhao, Xiaoxing Sun, Guannan Zhang, Brian G. Trewyn\*, Igor I. Slowing\*, and Victor S.-Y. Lin

Department of Chemistry, U.S. Department of Energy Ames Laboratory, Iowa State University, Ames,  
Iowa 50011-3111, U.S.A.

\*Address correspondence to: bgrewyn@iastate.edu and islowing@iastate.edu

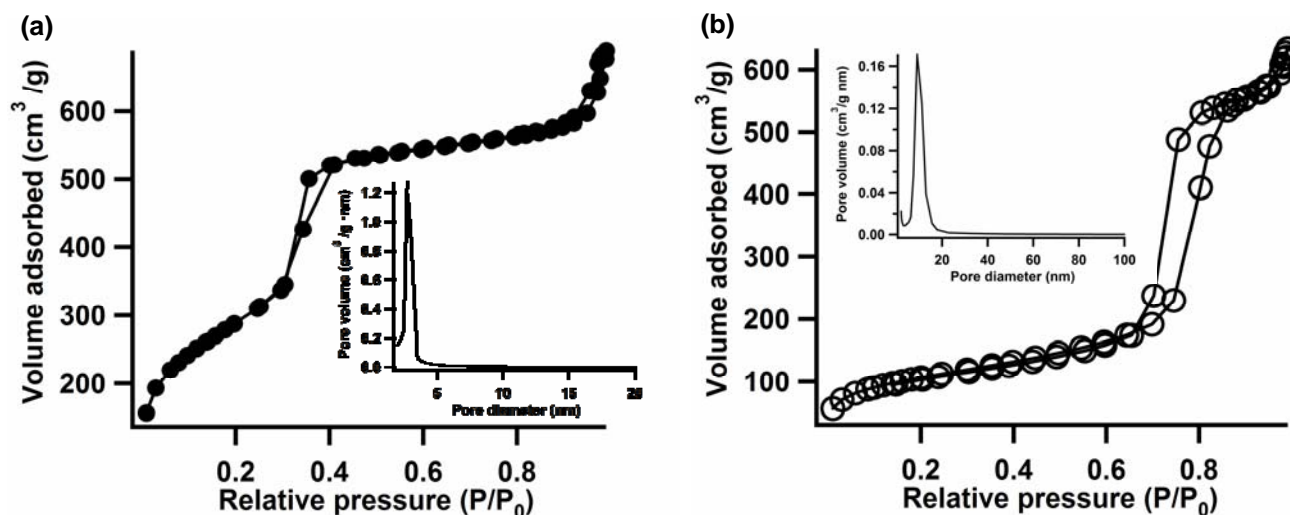

**Figure S1.** Linear plot of the nitrogen sorption isotherms and pore size distributions of (a) *s*-MSN and (b) *l*-MSN. Surface areas of *s*-MSN and *l*-MSN were calculated to be  $1051.6 \pm 2.2 \text{ m}^2 \text{ g}^{-1}$  and  $387.0 \pm 1.3 \text{ m}^2 \text{ g}^{-1}$ , respectively.

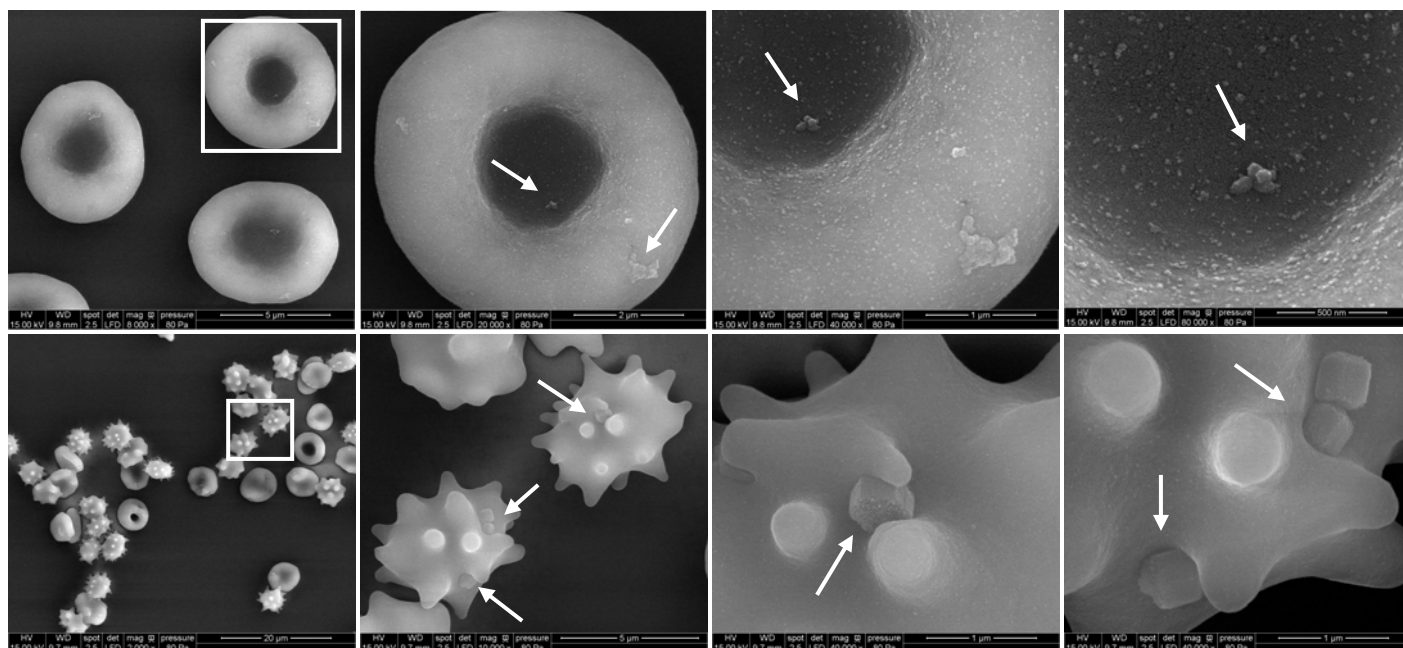

**Figure S2.** Scanning electron micrographs (SEM) of RBCs (5% hematocrit) incubated with  $100 \mu\text{g mL}^{-1}$  *s*-MSN (top) and *l*-MSN (bottom). Images increase in magnification from left to right with features highlighted with white squares or arrows, indicating the location of particles attached on RBC membrane.

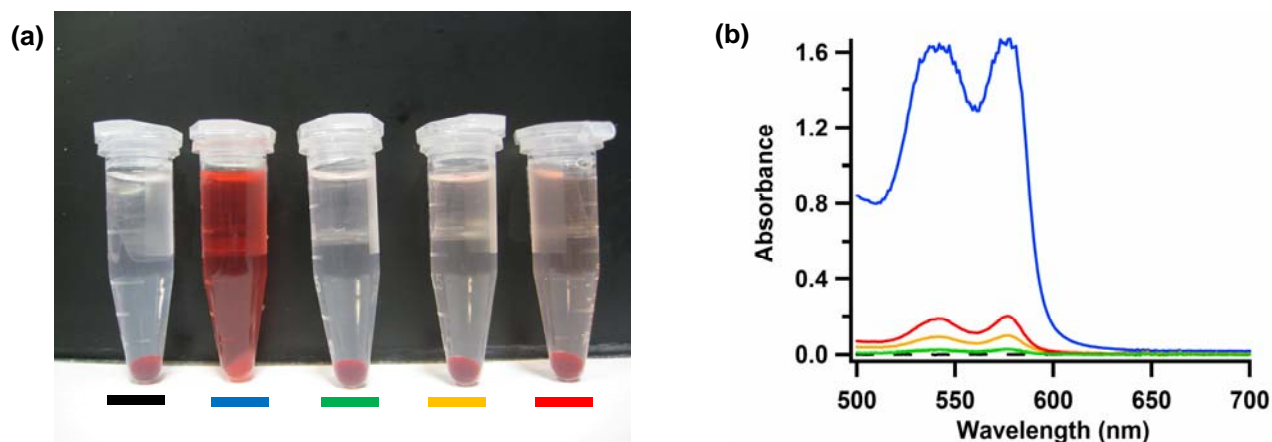

**Figure S3.** Hemolysis assay for *l*-MSN using water as a positive control (blue lines) and PBS as a negative control (dashed black lines). The materials were suspended at 20 (green), 50 (yellow) and 100 (red)  $\mu\text{g mL}^{-1}$ . The mixtures were centrifuged to detect the presence of hemoglobin (red) in the supernatant visually (a) and by absorption at 541 nm (b).

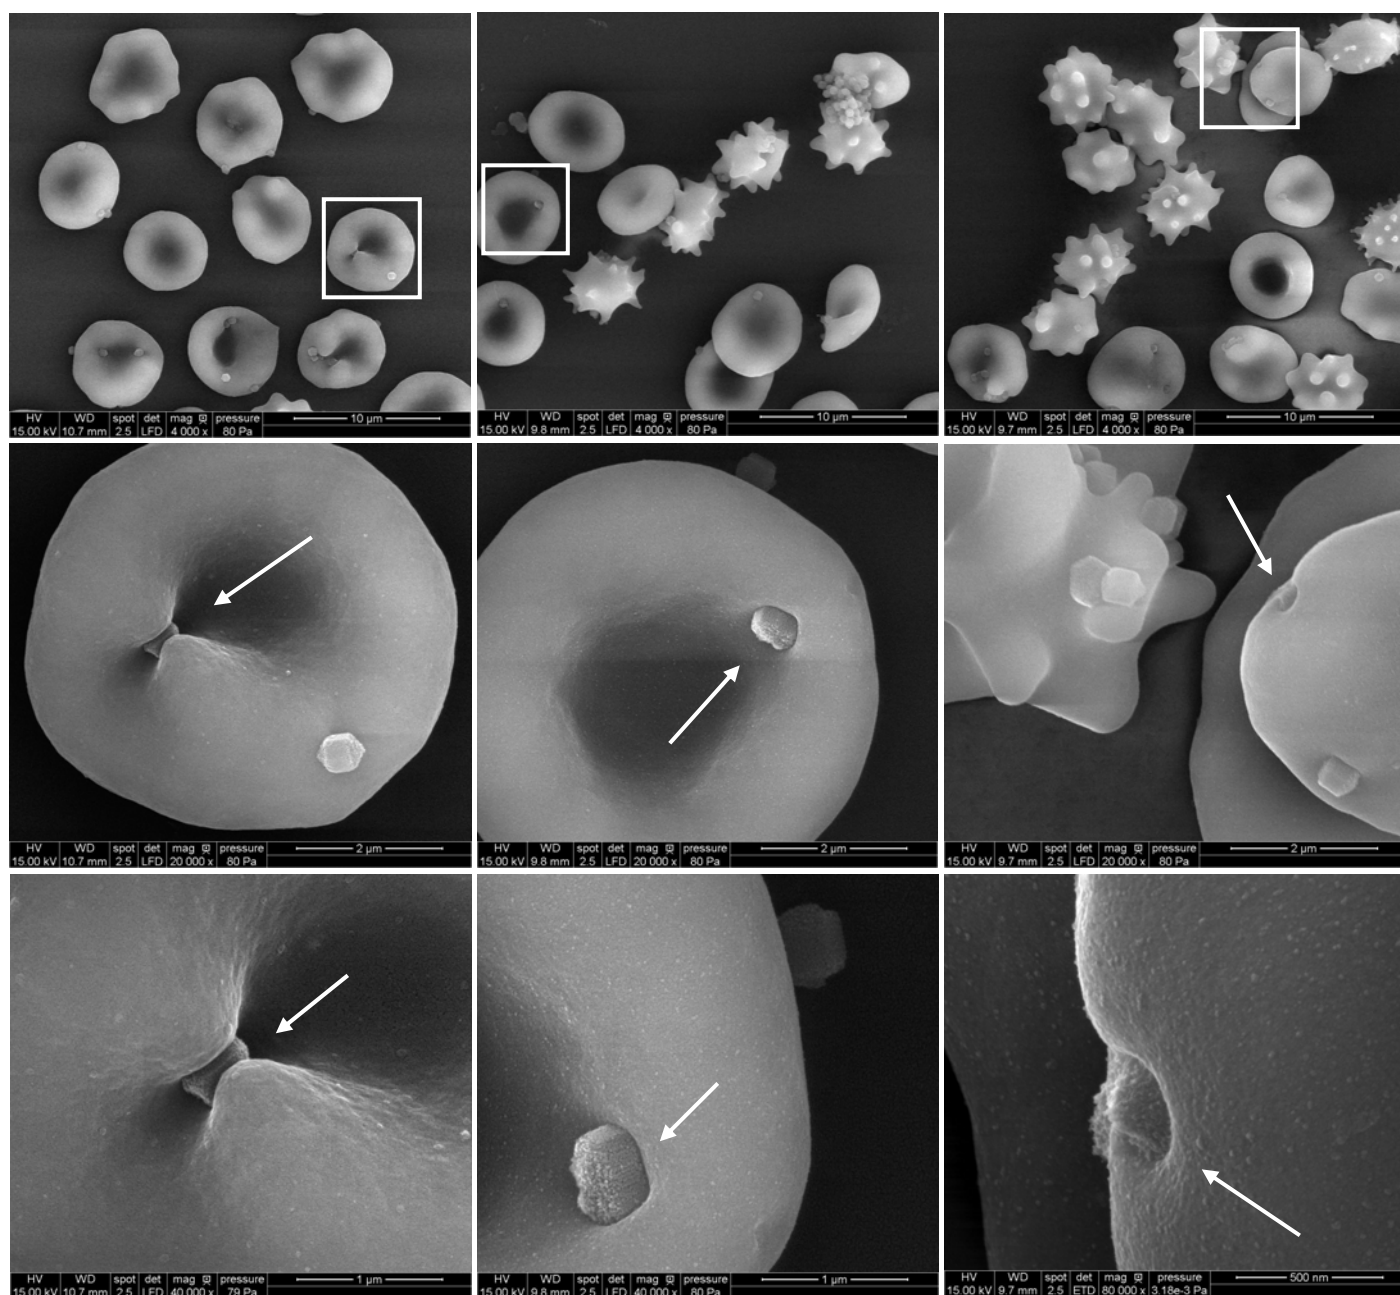

**Figure S4.** Scanning electron micrographs (SEM) of RBCs (5% hematocrit) incubated with 20  $\mu\text{g mL}^{-1}$  (left), 50  $\mu\text{g mL}^{-1}$  (middle), and 100  $\mu\text{g mL}^{-1}$  of *l*-MSN (right). Percent of spiculated RBCs were observed to be < 10%, ~50% and ~90% from left to right. Images increase in magnification from top to bottom with features highlighted with white squares or arrows, indicating the location of particles attached on RBC membrane.

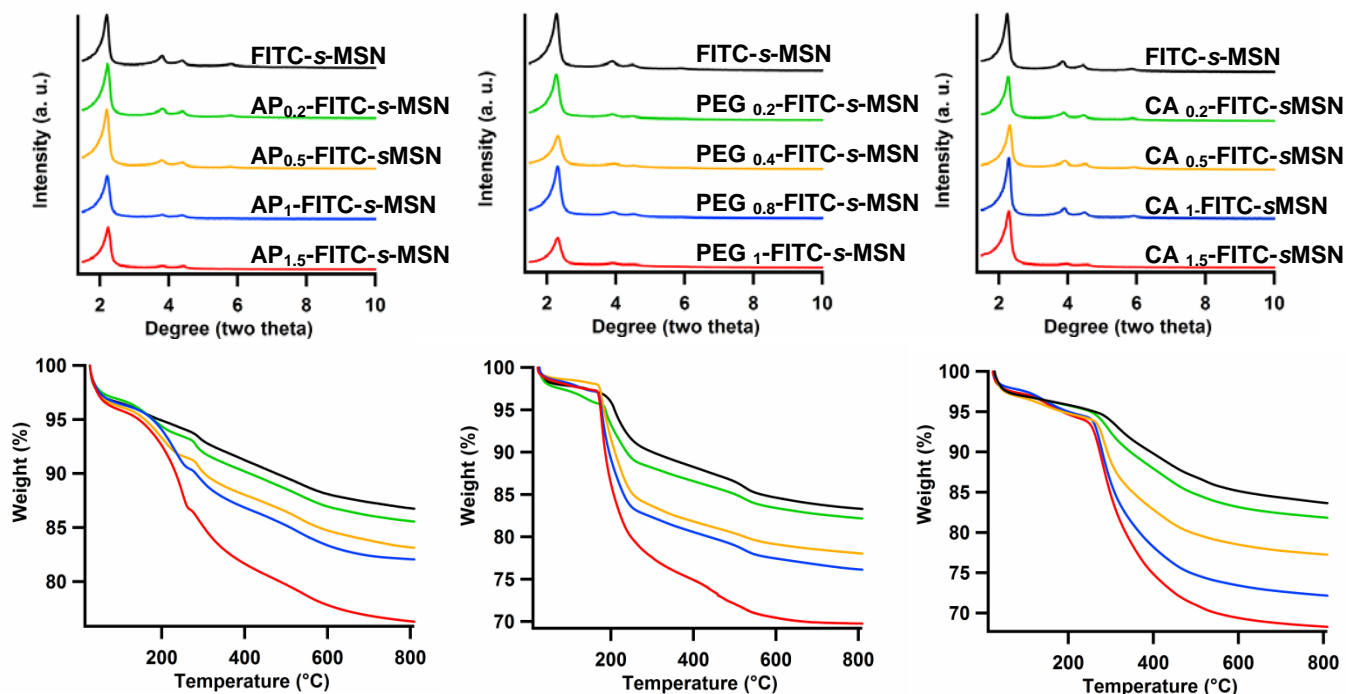

**Figure S5.** X-ray diffraction patterns (top) and thermogravimetric analysis (bottom) of FITC-*s*-MSN, AP<sub>*x*</sub>-FITC-*s*-MSN (left), PEG<sub>*x*</sub>-FITC-*s*-MSN (middle) and CA<sub>*x*</sub>-FITC-*s*-MSN (right) (*x*: amount of organic groups introduced in mmol g<sup>-1</sup>).

**Table S1.** Characteristics of FITC-*s*-MSN, AP<sub>*x*</sub>-FITC-*s*-MSN, PEG<sub>*x*</sub>-FITC-*s*-MSN and CA<sub>*x*</sub>-FITC-*s*-MSN (*x*: amount of organic groups introduced in mmol g<sup>-1</sup>).

| Materials                               | Surface groups<br>(mmol g <sup>-1</sup> ) | Zeta potential<br>(mV) | Surface area<br>(m <sup>2</sup> g <sup>-1</sup> ) | Pore size<br>(nm) |
|-----------------------------------------|-------------------------------------------|------------------------|---------------------------------------------------|-------------------|
| FITC- <i>s</i> -MSN                     | 0.02                                      | -27.9                  | 1043.4 ± 4.2                                      | 3.0               |
| AP <sub>0.2</sub> -FITC- <i>s</i> -MSN  | 0.1-0.2                                   | -22.9                  | 948.3 ± 7.9                                       | 2.8               |
| AP <sub>0.5</sub> -FITC- <i>s</i> -MSN  | 0.4-0.6                                   | -10.9                  | 878.7 ± 11.7                                      | 2.8               |
| AP <sub>1</sub> -FITC- <i>s</i> -MSN    | 0.6-0.8                                   | +3.2                   | 796.8 ± 1.6                                       | 2.8               |
| AP <sub>1.5</sub> -FITC- <i>s</i> -MSN  | 1.2-1.6                                   | +6.87                  | 689.0 ± 29.0                                      | 2.7               |
| FITC- <i>s</i> -MSN                     | 0.03                                      | -29.3                  | 1036.4 ± 11.2                                     | 2.6               |
| PEG <sub>0.2</sub> -FITC- <i>s</i> -MSN | 0.03-0.04                                 | -26.1                  | 985.6 ± 9.0                                       | 2.6               |
| PEG <sub>0.4</sub> -FITC- <i>s</i> -MSN | 0.1-0.2                                   | -22.3                  | 839.6 ± 9.3                                       | 2.4               |
| PEG <sub>0.8</sub> -FITC- <i>s</i> -MSN | 0.2-0.3                                   | -20.7                  | 770.8 ± 1.6                                       | 2.4               |
| PEG <sub>1</sub> -FITC- <i>s</i> -MSN   | 0.4-0.5                                   | -13.1                  | 628.9 ± 2.6                                       | 2.4               |
| FITC- <i>s</i> -MSN                     | 0.03                                      | -28.6                  | 1107.8 ± 8.6                                      | 2.7               |
| CA <sub>0.2</sub> -FITC- <i>s</i> -MSN  | 0.07-0.1                                  | -34.3                  | 967.4 ± 2.9                                       | 2.5               |
| CA <sub>0.5</sub> -FITC- <i>s</i> -MSN  | 0.3-0.4                                   | -36.1                  | 913.6 ± 19.2                                      | 2.4               |
| CA <sub>1</sub> -FITC- <i>s</i> -MSN    | 0.5-0.7                                   | -39.2                  | 863.0 ± 9.2                                       | 2.4               |
| CA <sub>1.5</sub> -FITC- <i>s</i> -MSN  | 0.7-1                                     | -42.7                  | 779.2 ± 5.0                                       | 2.5               |

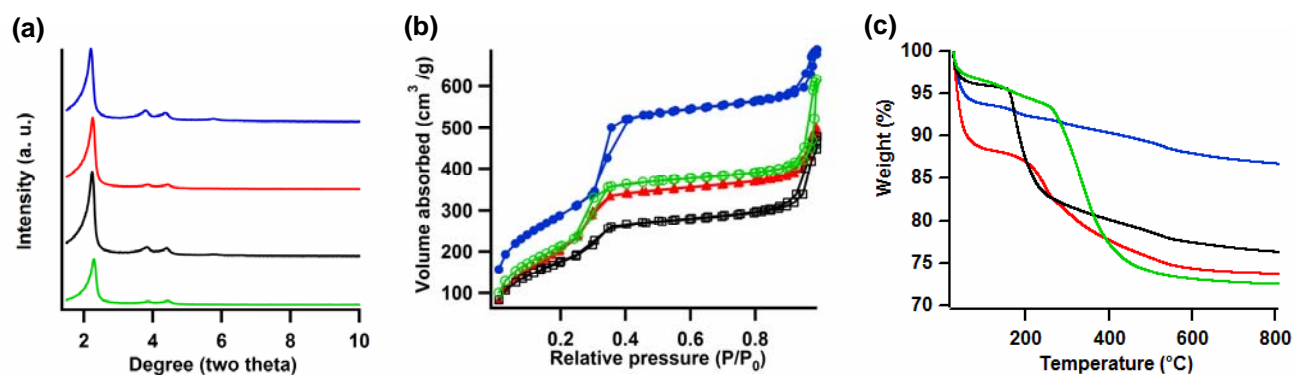

**Figure S6.** (a) X-ray diffraction (XRD) patterns, (b) linear plot of the nitrogen sorption isotherms and (c) thermogravimetric analysis (TGA) of *s*-MSN (blue), AP<sub>1.5</sub>-*s*-MSN (red), PEG<sub>1</sub>-*s*-MSN (black) and CA<sub>1.5</sub>-*s*-MSN (green).

**Table S2.** Characteristics of *s*-MSN, AP<sub>1.5</sub>-*s*-MSN, PEG<sub>1</sub>-*s*-MSN, CA<sub>1.5</sub>-*s*-MSN and *l*-MSN.

| Materials                         | Surface groups<br>(mmol g <sup>-1</sup> ) | Zeta potential<br>(mV) | Surface area<br>(m <sup>2</sup> g <sup>-1</sup> ) | Pore size<br>(nm) | Hydrodynamic<br>particle size (nm) |
|-----------------------------------|-------------------------------------------|------------------------|---------------------------------------------------|-------------------|------------------------------------|
| <i>s</i> -MSN                     |                                           | -22.2                  | 1051.6 ± 2.2                                      | 3.1               | 122                                |
| AP <sub>1.5</sub> - <i>s</i> -MSN | 1.1-1.5                                   | +5.79                  | 780.3 ± 9.0                                       | 2.4               | 142                                |
| PEG <sub>1</sub> - <i>s</i> -MSN  | 0.3-0.4                                   | -11.6                  | 650.5 ± 2.9                                       | 2.7               | 122                                |
| CA <sub>1.5</sub> - <i>s</i> -MSN | 0.6-0.9                                   | -43.1                  | 792.9 ± 4.4                                       | 2.9               | 142                                |
| <i>l</i> -MSN                     |                                           | -16.5                  | 387.0 ± 1.3                                       | 9.0               | 531                                |

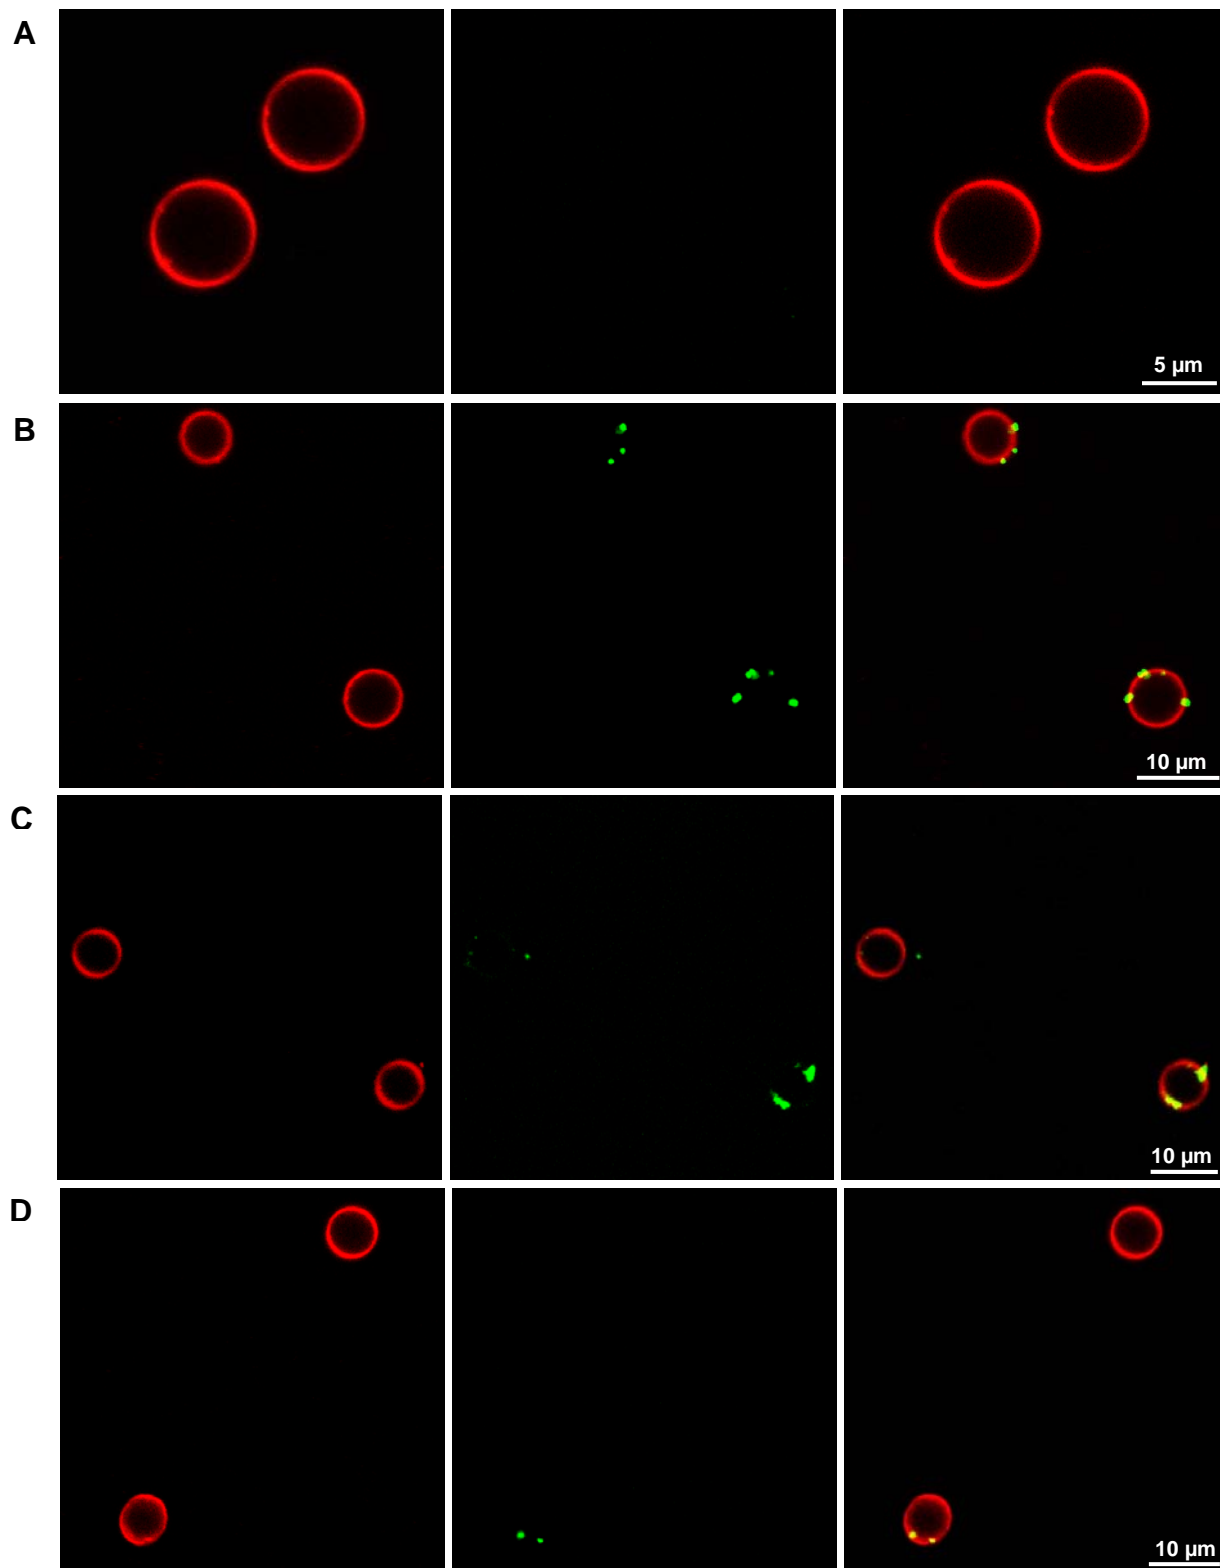

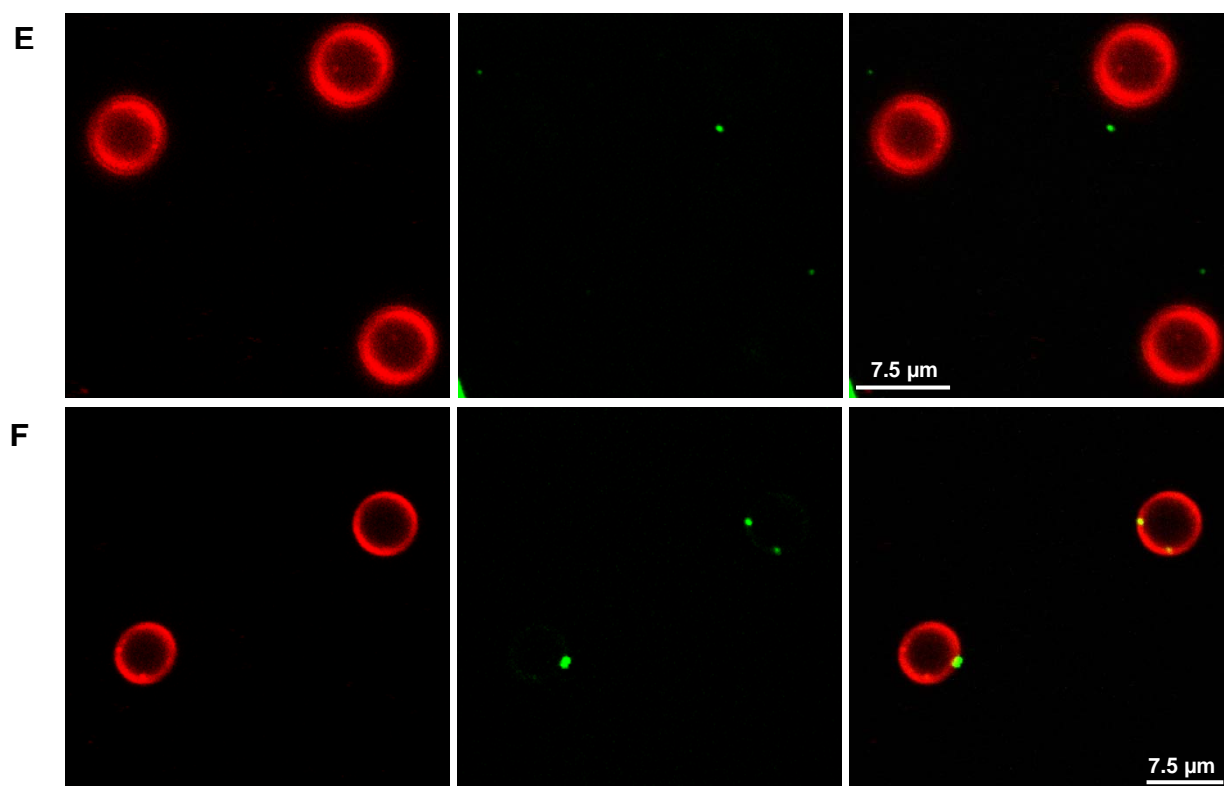

**Figure S7.** Confocal fluorescence micrographs of (A) RBCs ( $5 \times 10^6$  cells  $\text{mL}^{-1}$ ) incubated with  $20 \mu\text{g mL}^{-1}$  of (B) FITC-*l*-MSN, (C) FITC-*s*-MSN, (D) AP<sub>1.5</sub>-FITC-*s*-MSN, (E) PEG<sub>1</sub>-FITC-*s*-MSN and (F) CA<sub>1.5</sub>-FITC-*s*-MSN. The channels from left to right correspond to red blood cells stained with PKH26 red fluorescence dye, FITC-MSNs and the merged images.

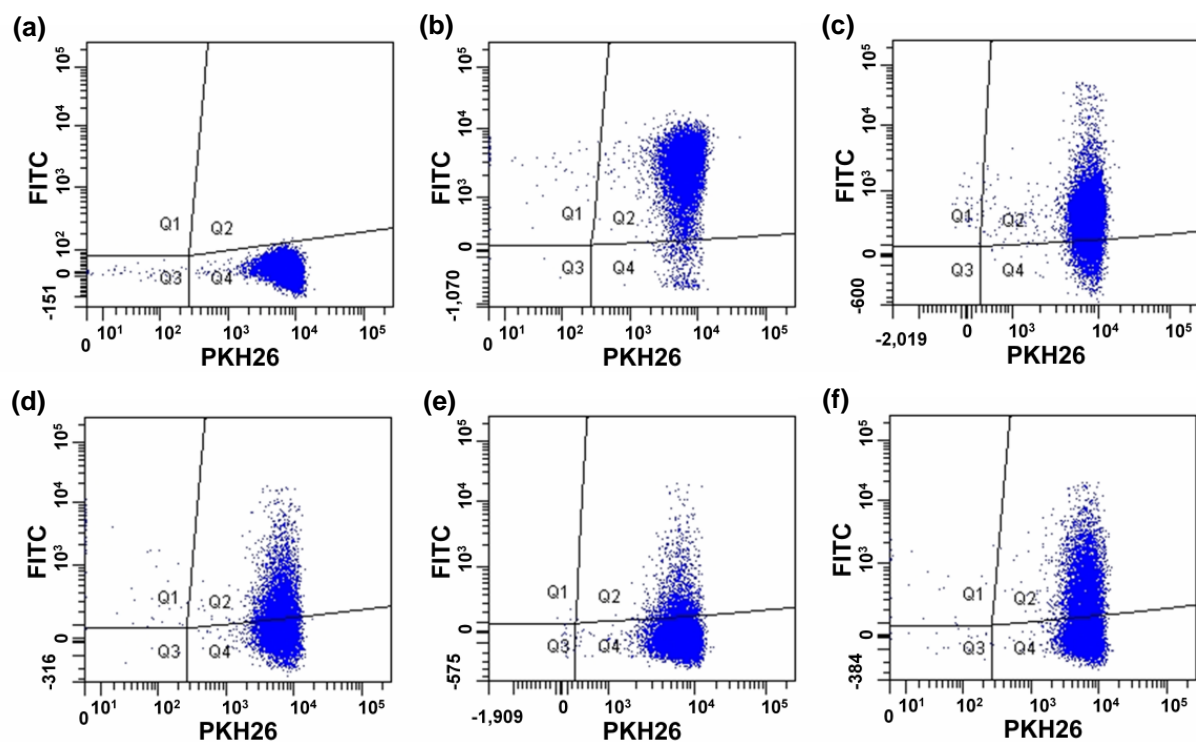

**Figure S8.** Dot plot from the flow cytometry analysis of (a) PKH26 labeled RBC incubated with (b) FITC-*l*-MSN, (c) FITC-*s*-MSN, (d) AP<sub>1.5</sub>-FITC-*s*-MSN, (e) PEG<sub>1</sub>-FITC-*s*-MSN and (f) CA<sub>1.5</sub>-FITC-*s*-MSN. The axes correspond to the intensity of red fluorescence due to PKH26 labeling (horizontal axis) and green fluorescence due to the attachment of FITC-MSNs onto PKH26-RBCs (vertical axis). The plot was gated to show PKH26 labeled RBCs in area Q4 and FITC-fluorescent PKH26-RBCs in area Q2.
